1 **Title:** Flexible and open-source programs for quantitative image analysis in microbial ecology

2

3

4 **Authors:** Alexis L. Pasulka<sup>1</sup>, Jonathan F. Hood<sup>2</sup>, Dana E. Michels<sup>1</sup>, Mason D. Wright<sup>1</sup>

5

6

7 <sup>1</sup>Biological Sciences Department, California Polytechnic State University, San Luis Obispo, CA

8 93407, USA

9 <sup>2</sup>Aerospace Engineering Department, California Polytechnic State University, San Luis Obispo,

10 CA 93407, USA

11

## 12 **Abstract**

13 Epifluorescence microscopy is an essential tool for obtaining reliable estimates of the abundance  
14 of marine microorganisms including viruses. However, computational analysis is required to  
15 gain consistent and quantitative data from digital microscopy images. Many imaging programs  
16 are proprietary and cost-prohibitive. The currently available free imaging programs are often  
17 platform specific and/or lack the flexibility to analyze microscopy images from natural samples,  
18 such as the planktonic environment, which can contain challenges such as debris and high  
19 background signals. Here we describe two MATLAB-based open-source image analysis  
20 programs that work across computer platforms and provide the tools to analyze a range of image  
21 types and cell sizes with a user-friendly interface. The Microbial Image Analysis (MiA) program  
22 aims to provide flexibility for the selection, identification, and quantification of cells that vary in  
23 size and fluorescence intensity within natural microbial communities. The Viral Image Analysis  
24 (ViA) program aims to provide an effective means for quantifying viral abundances from  
25 epifluorescence images as well as enumerating the intensity of a primary and secondary stain. In  
26 this paper, we provide an overview of the functionality of the MiA and ViA programs and  
27 highlight specific program features through several microbial image case studies.

28

29

## 30 **Introduction**

31 Direct measurements of microbial abundance and biomass are critical for accurately  
32 characterizing the distribution of microorganisms (e.g., viruses, bacteria, phytoplankton, and  
33 microzooplankton) across marine ecosystems and their contributions to biogeochemical cycles in  
34 the ocean (Miloslavich et al. 2018, Khachikyan et al. 2019). Epifluorescence microscopy is a  
35 cornerstone of marine microbiology research (e.g., Hobbie et al. 1977, Weinbauer and Suttle  
36 1997, Noble and Fuhrman 1998, Sherr and Sherr 1983) and has enabled scientists to visualize  
37 marine microbes across a wide range of sizes (e.g., <0.2  $\mu\text{m}$ -200  $\mu\text{m}$ ). In addition to quantifying  
38 the abundance, biomass, and size structure of natural marine microbial communities (e.g., Patel  
39 et al. 2007, Christaki et al. 2011, Pasulka et al. 2013, Taylor et al. 2012, 2015), epifluorescence  
40 microscopy has been used to gain insight into particular taxonomic groups (via fluorescent *in situ*  
41 hybridization – FISH; Pernthaler and Amann 2004), growth rates (Hamasaki et al. 2004),  
42 microzooplankton grazing rates (Sherr et al. 1987), trophic modes (Caron 1983), and to  
43 determine active members of a microbial community (via substrate analog probing;  
44 Hatzenpichler et al. 2014, Samo et al. 2014). Automated quantitative imaging devices (e.g.,

45 Imaging FlowCytobot; Olson and Sosik 2007, Sosik and Olson 2007) are improving the  
46 spatiotemporal resolution over which marine microbial communities can be characterized and  
47 can help lead to an improved global plankton observation effort (see Lombard et al. 2019 for  
48 review of current technology). However, these efforts are not meant to replace precise, fine-  
49 scale, and high-quality local sampling conducted during oceanographic cruises or as part of site-  
50 specific observation sampling projects. In addition, super-resolution fluorescence microscopy  
51 approaches are changing our ability to visualize viruses and their interactions (Castelletto and  
52 Boretti 2021), but conventional wide-field fluorescence microscopes are still used to determine  
53 the abundance of viruses from environmental and culture samples (e.g., Turzynski et al. 2021  
54 and sources within). Therefore, efforts are needed to continue integrating the visualization of  
55 microorganisms within discrete studies to gain comprehensive insight into how marine microbial  
56 communities are structured and their influence on marine ecosystem functions (Sebastian and  
57 Gasol 2019).

58 While microbial ecologists have used microscopy to visualize microbial communities for  
59 decades, advancements in microscope, camera, and computing technology have made digital  
60 image analysis a more common and essential tool (Wollman and Stuurman 2007, Waters 2009,  
61 Waters and Wittman 2014, Wait et al. 2020). Image analysis software programs exist, but many  
62 are proprietary and can be cost prohibitive (e.g., Imaris, ImagePro). Free programs such as  
63 ImageJ ([imagej.nih.gov](http://imagej.nih.gov)) and CellProfiler (McQuin et al. 2018, Carpenter et al. 2006) can be  
64 valuable for culture and larger-cell applications, but many lack the flexibility and customization  
65 needed to analyze complex environmental samples and small-particles like viruses. Programs  
66 like Daim (Daims et al. 2006) are more applicable to environmental samples, but are platform  
67 specific (e.g., Windows and Linux). Furthermore, the quantification of viral particles remains a  
68 challenge across all platforms due to their small size (e.g., Shopov et al. 2000, Barrero-Canosa  
69 and Moraru 2018). A few MATLAB-based open-source programs have been developed to track  
70 the movement of viral particles (Jaqaman et al. 2008, Lee et al. 2016, Wang et al. 2018), but an  
71 easy-to-use software for quantifying viral particle abundance and fluorescence from cultured and  
72 environmental samples does not exist. Therefore, as tools such as phageFISH (Allers et al. 2013,  
73 Barrero-Canosa and Moraru 2018) and viral BONCAT (Pasulka et al., 2018) are applied in  
74 natural communities, open-source image analysis tools are still needed.

75 Here we describe two MATLAB-based, open-source programs for analyzing  
76 epifluorescence microscopy images of microbial communities. The programs can be run through  
77 MATLAB (on a Mac or PC) or can be downloaded as executable programs and run through the  
78 freely available MATLAB runtime environment. MATLAB has a breadth of functions useful for  
79 analyzing digital microscopy images, but these are inaccessible to users without a working  
80 knowledge of coding in MATLAB. The two programs presented here put the functions of  
81 MATLAB analyses in the hands of the users in an easy-to-use manner with no prior knowledge  
82 of code required. The Microbial Image Analysis (MiA) program aims to provide flexibility for  
83 the selection, identification, and quantification of cells that vary in size and fluorescence  
84 intensity (natural or probe-conferred) within natural microbial communities. Additionally, MiA  
85 has a cell-ID feature that enables the user to define and classify regions of interest (ROIs) real-  
86 time during image analysis. The Viral Image Analysis (ViA) program aims to provide an  
87 effective means for quantifying viral abundances from epifluorescence images as well as  
88 enumerating the intensity of a primary (e.g., SYBR Gold) and secondary stain (e.g., biorthogonal  
89 non-canonical amino acid tagging [BONCAT] or FISH). Both programs enable the user to export  
90 data in easy-to-use formats, facilitating downstream analysis. Below we provide an overview of

91 the functionality of the MiA and ViA programs and highlight specific program features through  
92 several case studies. The case studies include microscopy images of:

- 93 1) a natural mixed phytoplankton community to demonstrate the flexibility of ROI
- 94 selection and the functionality of the cell ID feature,
- 95 2) a mixed culture of the dinoflagellate grazer *Oxyrrhis marina* and phytoplankton
- 96 *Dunaliella tertiolecta* to illustrate the separation of populations based the cell size and
- 97 spectral properties collected by the program, and
- 98 3) *Emiliana huxleyi* viruses (EhV) to explore the quantification of viral abundance (via
- 99 SYBR Gold staining) and the detection of a fluorescence signal from amino acid tagging.

100

101

## 102 **MiA and ViA Packages**

103

### 104 *Installation and Requirements*

105 The MiA and ViA programs can run either as a script inside the MATLAB software or as  
106 an executable outside of the MATLAB software. Both the source-code for the script and the  
107 executable can be downloaded from a public GitHub repository (see Methods for details). In  
108 order to run the program via the source code in MATLAB, MATLAB R2020a or later must be  
109 installed. In order to run the executable program, the latest MATLAB Runtime Environment  
110 must be installed. Comprehensive online documentation for the programs can also be found on  
111 the GitHub public repository (see Data Availability section for details).

112

### 113 *Package Structure and Overview of Modules*

114 Overall, the MiA and ViA programs are constructed with a series of object-oriented  
115 packages and classes (Figure 1). The packages are named according to their functionality and  
116 include “bfmatlab”, “Constants”, “Events”, “Figure”, and “Interfaces”. The external package  
117 “bfmatlab”, is part of the Bio-Formats program developed by the Open Microscopy Environment  
118 ([www.openmicroscopy.org](http://www.openmicroscopy.org)) for opening Zeiss-formatted images (e.g., .czi files) with slight  
119 modifications to allow for visible status updates in the MiA and ViA graphical user interfaces  
120 (GUIs). The “Constants” package was designed to hold any desired program-wide constants.  
121 Currently, only graphical constants are held in that package, including x- and y- spacing values,  
122 figure position arrays, and small to large font sizes. The “Events” package was created to hold  
123 any custom events for the program. At the present stage, only a minimalist EventData wrapper  
124 subclass object is required to pass along single-action values as EventData. The “Figure”  
125 package holds all general items related to figure creation or figure manipulation classes,  
126 including a class that creates a completely blank figure, a customized question dialog box, a  
127 customized file selection panel, and a custom status update panel. These classes were designed to  
128 be modular, and can be leveraged to more efficiently create new “Figure” or “Interface” classes.  
129 Within “Figure”, there is a sub-package entitled “Functions” designed to hold any additional  
130 functionality capable of manipulating or modifying existing graphics. Currently, the only file  
131 within this sub-package is a modified version of an external MATLAB FileExchange program  
132 “dragzoom.m” that gives the user various abilities when dealing with one or multiple axes  
133 objects. In the Mac version of each program, this package also has a “MacFix” sub-package,  
134 specifically for the post-Catalina OS on Mac devices which interferes with MATLAB’s  
135 “uigetfile” ability to select separate file extension objects. Within this sub-package is a modified

136 version of a MATLAB FileExchange “uigetfile\_with\_preview.m”, employing an older version of  
137 MATLAB file interface that does not have the same communication protocol problem.

138 The “Interfaces” package of both programs contains a series of classes. Each class is a  
139 subset interface (e.g., a full figure interface or an inset panel interface) designed to work with the  
140 primary interface “image\_analysis.m” or “viral\_analysis.m for MiA or ViA, respectively.  
141 Running the primary interface opens the full program. Within MiA, the classes include  
142 “analyze.m”, “bckgrnd\_sub\_interface.m”, “channel.m”, “manual\_threshold\_interface.m”,  
143 “roi\_stats.m”, “select\_channel.m”, and “roi\_identification\_interface.m”. Within ViA, the classes  
144 include “analyze.m”, “channel.m”, “manual\_threshold\_interface.m”, “roi\_stats.m”, and  
145 “select\_channel.m”. The “Interfaces” package varies the most between the MiA and ViA  
146 programs, and has minor differences between the PC and Mac versions. ViA has a sub-package  
147 “Functions” that holds functions necessary for the “Interfaces” to function. Currently, this sub-  
148 package contains a MATLAB FileExchange file by name of “findjob.m”, which extracts the  
149 underlying java object within a passed container or MATLAB GUI handle.

150 Collectively the structure describe above creates a simple user interface for both MiA and  
151 ViA. The MiA user interface displays the image in the middle of the panel, statistics on the left-  
152 hand side of the panel, and image options on the right-hand side of the panel (Figure 2). A series  
153 of dropdown menus provide the user the functionality to load images, select and modify ROIs,  
154 save data, and adjust display settings. After the user loads an image and assigns color channels,  
155 the program tools (Table 1) can be used in any order. Examples of how some of these tools can  
156 be used are described in case studies 1 and 2 below. The ViA program interface (Figure 3)  
157 differs from the MiA program interface because the processing of viral images requires less  
158 manual selection of ROIs and occurs in a specific order. The left-hand side of the interface  
159 displays the image (or images) and the right-hand side of the interface displays a series of panels  
160 that the user engages with in a sequential order to process a viral image (Table 2, Figure 3).  
161 Figure 3 is displaying the final processed viral image after subtracting the background,  
162 thresholding, and removing artifacts when either a single channel viral image is used (e.g., DNA  
163 signal; Figure 3A) or a dual-channel viral image is used (e.g., viral BONCAT signal; Figure 3B).  
164 More details for the steps are provided in Case Study 3 below.

165

## 166 **Image Analysis Examples and Workflow**

167 In this section, we have selected a range of epifluorescence images to showcase the  
168 capabilities of these imaging programs including 1) flexible options for region of interest (ROI)  
169 selection, 2) the ROI identification tool, 3) an example of the quantitative data that gets extracted  
170 from ROIs, and 4) several examples of how this data can be used to characterize microbial  
171 community structure (via abundance or size) or quantify a fluorescence signal (e.g., fluorescence  
172 in situ hybridization signal). Materials for each case studying including images and data  
173 generated from the images are all available on the public GitHub repository (see Data  
174 Availability section for details).

175

## 176 **Case Study 1 – Natural Plankton Community**

177

### 178 *Flexible options for region of interest (ROI) selection*

179 The MiA Program has a variety of ROI selection options (Table 1) that enable the user to  
180 accurately and efficiently select cells across a range of image types. Analyzing images produced  
181 from complex environmental samples can be challenging due to varying degrees of fluorescence

182 signals across cells and background signal from debris (Figure 4A). Therefore, these types of  
183 images often require different analysis strategies than images with consistent cell types and dark  
184 backgrounds (e.g., Case Study 2). The program allows for seamless toggling between different  
185 cell-selection approaches to best meet the needs of each area of an image. The user can also  
186 adjust contrast within any channel real-time during analysis (Figure 4B), which does not alter the  
187 data in any way, but gives users the ability to intensify the signal of a dim cell for the purposes of  
188 cell selection.

189 While MiA enables thresholding cells across the entire image at once, uneven  
190 backgrounds can make whole-image approaches problematic. Therefore, regional thresholding is  
191 particularly valuable for environmental images (Figure 4C). To add additional flexibility, the  
192 user can select the channel to be used by the thresholding algorithm for defining ROIs. In  
193 addition, the program offers users the ability to select individual cells (e.g., single ROI selection)  
194 or carry out free-hand drawing. If two cells are close together and are incorrectly selected as one  
195 cell, the ‘split cell’ feature enables the user to easily separate the cells (see Case Study 2 and  
196 Figure 5B for details). The program also offers a number of ROI removal options. Users have the  
197 option to delete a single ROI, multiple ROIs within a selected region, or all ROIs. In addition  
198 to ROI removal, there is a pixel size-selection feature that enables users the ability to set a limit  
199 and remove small cells (or even image artifacts) or set an upper limit and remove large cells  
200 (Figure 2). The background subtraction feature, with several different strategies to choose from,  
201 can be used for more complicated images of natural microbial communities. It is important to  
202 note that because background subtraction has the potential to alter the data, the original and  
203 background subtracted data are provided upon data export. While users can only visualize three  
204 channels at a time during image analysis (e.g., Red, Green, Blue), if additional channels exist,  
205 users can switch between the channels that are visualized during image analysis and ROI  
206 selection. Furthermore, data from all channels (not just those visualized) can be exported at the  
207 end of an image analysis session using the mask file (see ‘Saving Options’ for details).

208

#### 209 *ROI identification feature (ROI ID)*

210 While cell fluorescence and/or cell size can be used to separate populations of interest  
211 using the exported data after image analysis (see Case Study 2), specific types of cells from  
212 mixed, complex communities can be more challenging to identify from these types of data  
213 signals. Therefore, while carrying out image analysis the user has the option to manually identify  
214 and classify cells (Figure 4D). The user can enter different names by which they would like to  
215 identify cells (e.g., dinoflagellate and diatom). The feature enables users to identify only one type  
216 of cell (e.g., diatoms), or identify multiple cell types. While programs have been developed to  
217 obtain automated taxonomic classification and quantitative data from epifluorescence images  
218 (e.g., Hense et al. 2008, Schulze et al. 2013, Colin et al. 2017), these programs require large  
219 reference training sets. This scale of image analysis is not always required, nor feasible;  
220 therefore, there is still a need for manual image analysis for smaller-scale studies.

221

#### 222 *Saving options*

223 Working with microscopy images from a natural environment can be time-consuming  
224 and require multiple iterations. Therefore, the MiA program enables users to save a ‘mask’ file  
225 (.mat), which is a small file containing information about the masks or regions of interest  
226 identified by the user. Masks can be easily loaded and modified during any analysis session. The  
227 program also has an autosave feature that saves a mask file in the event that there is a computer

228 issue during analysis. When image analysis is complete, the user can export the data from their  
229 regions of interest. For each ROI, the data includes the ROI number, ROI identification (if  
230 designated), the fluorescence intensity (min, mean, and max) of the ROI in each color channel,  
231 the area, length, width and perimeter (all in pixels) of the ROI, and the x-y coordinates of the  
232 ROI on the image. If background subtraction was used (an option tool in the ROI Tools menu;  
233 Figure 2), the data also includes background subtracted fluorescence values, in addition to the  
234 original data. A ‘Data Summary’ sheet also gets saved as a second sheet in the file. This sheet  
235 contains the data visible in the ‘ROI Statistics’ panel of the primary program interface including  
236 total cells and min/max/mean/median ROI area in pixels. In addition, if a pixel to micron  
237 conversion factor was included, these statistics are also displayed in microns. While carrying out  
238 image analysis, the user can also save snapshots of the image. The snapshots maintain the current  
239 contrast adjustments and can be saved with or without outlines around the identified cells.

240

## 241 **Case Study 2 – Culture of phytoplankton (*Dunaliella tertiolecta*) and grazer (*Oxyrrhis*** 242 ***marina*)**

243

### 244 *Flexible options for region of interest (ROI) selection*

245 Images collected from plankton cultures, which typically have dark and even  
246 backgrounds, provide an opportunity to demonstrate a straightforward ROI selection process  
247 (Figure 5A). Additionally, the fluorescence data collected from these ‘clean’ digital images  
248 provides an opportunity to demonstrate how to separate populations and glean information from  
249 the ROI data post image analysis. Global thresholding can be used to threshold cells across the  
250 entire image. Using this feature, cells in close proximity to one another often get selected as a  
251 single ROI. In these cases, the split cell feature enables users to quickly and accurately separate  
252 individual cells by simply drawing a line through the ROI along the cell border (Figure 5B).

253

### 254 *Quantification of populations based on size or fluorescence signal*

255 While manual ROI identification, as demonstrated in Case Study 1, can be valuable for  
256 complex images, differentiating cell types by size or fluorescence signal can enable higher  
257 throughput means of ROI identification when working with images that have dark backgrounds  
258 and clear cell borders. Users can easily work with the exported data as part of the image analysis  
259 program. For Case Study 2, the phytoplankton and grazer image, we can separate the populations  
260 based on the red to green signal (Figure 5C) because the phytoplankton cells have a chlorophyll  
261 signal that the heterotrophic grazers do not. However, the signal used to separate populations can  
262 also come from an artificial label through FISH or BONCAT (e.g., Michels et al. 2021). The  
263 exported data also enables users to explore the size structure of the microbial community (Figure  
264 5D) and quantify the concentration of different cell types (example R code is available with the  
265 case study on the GitHub repository).

266

267

## 268 **Case Study 3 – Viral Image Analysis**

269

### 270 *Quantifying the abundance of viral particles*

271 Digital image analysis has been shown to be more efficient and accurate compared to  
272 microscopy-based estimates for enumerating viral particles from environmental samples,  
273 (Shopov et al. 2000, Chen et al., 2001, Barrero-Canosa and Moraru 2018). ViA, built from the

274 pipeline developed by Pasulka et al. (2018), is distinct from MiA because the ROI selection is  
275 designed to deal with the challenges of imaging small particles. Therefore, images are processed  
276 in a sequential manner (Table 2), but the user can modify the settings for each step. Single-  
277 channel images (Figure 3A) or dual-channel images (Figure 3B) can be loaded and processed.  
278 Dual channel images (discussed in more detail below) may be of interest when quantifying a  
279 FISH or BONCAT signal within viral particles. When images are loaded, the images can be  
280 assigned to either the “DNA” or the “LABELED” signal (Figure 3). It is important to note that  
281 the image assigned to the “DNA” signal is considered the true signal and is what will be used to  
282 define viral particles. The image processing steps are outlined in Table 2 and discussed in more  
283 detail below.

284 In digital images, the background adds to the signal of interest (Waters and Wittman  
285 2014). Since viral particles can vary in their fluorescence signal intensity (particularly when  
286 imaging a natural viral community), the background must be measured and subtracted from the  
287 intensity values of the pixels containing the signal of interest. Therefore, background subtraction  
288 is a critical first step in image processing using the ViA program (Table 2, Figure 6). The  
289 program uses a rolling-ball subtraction method. In short, a background value is determined for  
290 every disc (default disc size = 10 pixels), and the average intensity of each disc is subtracted  
291 from the disc’s area. Therefore, spatial variations in background intensity are easily accounted  
292 for in this approach and do not influence the ability to detect viral particles across the image.

293 Thresholding is then used to identify the viral particles in the image (Table 2, Figure 6).  
294 In this type of image segmentation, the image is converted from a grayscale image (Figure 6B) to  
295 a binary image (e.g., black and white; Figure 6C). In this way, thresholding is used as a way to  
296 select ROIs (i.e., white regions) while ignoring the rest of the image (i.e., black regions). The  
297 program provides an initial threshold level using Otsu’s method (Otsu 1979), but the user has the  
298 flexibility to adjust this level to find a balance between image artifacts and viral particles.

299 In the final step of image processing, small and/or large image artifacts can be removed  
300 (Figure 3). By selecting a minimum and maximum pixel size, the user can alter the number of  
301 particles that are considered real. When these values are adjusted, the data displayed in the  
302 statistics panel will also change (Table 2, Figure 3). At this point of image processing, ‘Total  
303 ROIs’ should reflect viral particle abundance for the image. If the user inputs a micrometer ( $\mu\text{m}$ )  
304 to pixel conversion (also available at this step), then the size statistics (min, max, median, and  
305 mean) of those particles in  $\mu\text{m}$  is also provided. While the user can record this information from  
306 the panel, these statistics are exported in the “summary sheet” upon data export.

307 Before exporting the data, the final data display panel may be useful for visualizing the  
308 size distribution of viral particles (Table 2, Figure 6D). This image processing pipeline has been  
309 used to visualize and quantify viral particles ranging from 50-200 nm using SYBR Gold (Pasulka  
310 et al. 2018). While the ability to resolve two individual particles from one another is set by the  
311 objective, the pixel resolution is set by the CCD camera; therefore, careful consideration of  
312 camera capabilities is critical for downstream analyses of viral particles. However, it is important  
313 to keep in mind that the size of the fluorescent signal is not the actual size of the viral particles  
314 (see Figure S5 in Pasulka et al. 2018). The final data display also provides information about the  
315 intensity of the fluorescence signal within the particles (Figure 6D), but this data may be more  
316 useful if two images are loaded (see below for more details). It is important to note that while the  
317 panels are meant to be used in a sequential order the first time an image is processed, the user  
318 can go back to any panel and adjust settings as needed.

319

## 320 *Detecting a fluorescent signal in viral particles*

321 Approaches such as phageFISH (Allers et al. 2013) and viral-BONCAT (Pasulka et al.  
322 2018) provide the ability to quantify the abundance of particular types of viruses and/or monitor  
323 viral infection dynamics, respectively. However, digital image analysis is still needed in order  
324 accurately quantify the co-localization of fluorescence signals. The general processing of viral  
325 images is the same if one or two channels are loaded. However, when two image channels are  
326 loaded, the user can input different background subtraction values, threshold levels, and artifact  
327 removal settings for each image.

328 One additional step that gets activated when two image channels are loaded is the image  
329 alignment step (Table 2). Proper microscope alignment is critical for optimal image analysis.  
330 While nanometer differences between filter cube alignment do not pose a problem for larger cells  
331 (e.g.,  $>1\mu\text{m}$ ), these shifts can be problematic for sub-micron particles such as viruses, especially  
332 when you are interested in co-locating a fluorescence signal. Therefore, the alignment step is  
333 meant to ensure the images are properly aligned.

334 The artifacts removal panel will now show the particle statistics for both image channels  
335 (Figure 3B), which can be useful for determining how many particles are labeled. When working  
336 with two image channels, the channel labeled DNA is considered the image with the ‘real’ viral  
337 particles. To visualize how labeled viral particles match up with these DNA viral particles, the  
338 display centroids feature can be used (Figure 2, Figure 6E). This places red circles around all  
339 DNA-image defined ROIs on both images. The final data display panel is also a useful place to  
340 visualize this information, as the histograms now show the LABELED to DNA fluorescence  
341 ratio (Figure 6D). While the user is recommended to export the data and process the signal for  
342 labeled viruses according to other methods (e.g., Pasulka et al. 2018), the red to green  
343 fluorescence ratio (i.e., the DNA to LABELED ratio) was distinct in viral particles produced  
344 from a host grown in the presence of HPG relative to viral particles produced by an unlabeled  
345 host control culture. Therefore, the ratio of fluorescence signals can provide the user a quick  
346 peek of the level of labeling in a treatment if compared to an unlabeled control (Pasulka et al.  
347 2018). The display shows both the raw fluorescence data and the background subtracted  
348 fluorescence data so the user can quickly visualize the effect of background subtraction on the  
349 signal (Figure 6D). Therefore, if changes are needed in the background subtraction step (or any  
350 step), they can occur during image processing. Furthermore, the histograms can be saved as an  
351 image for quick reference later.

352

## 353 **Discussion**

354

355 MiA and ViA were designed as open-source microscopy image analysis programs (GNU  
356 General Public License version 3) that work on both PCs and MACs, are easy to use, and  
357 provide the tools to analyze a range of image types and cell sizes. While MiA and ViA are  
358 MATLAB-based programs, the user does not need to have any coding knowledge to use the  
359 programs. Furthermore, the executable versions are available for users who do not have access to  
360 the proprietary MATLAB software. Open-source imaging programs such as these are meant to  
361 provide transparency and reproducibility for data collection from microscopy images.  
362 Furthermore, the code is open-source, which encourages improvements as well as the flexibility  
363 for the community to take the program in new directions. While the field of marine microbiology  
364 is moving towards more automated image analysis (Benfield et al. 2007, Schulze et al. 2013,  
365 Colin et al. 2017), the ability to gain quantitative information from microscopy images with



366 flexible ROI-selection options without needing to purchase expensive software and/or to develop  
367 large training sets is still needed. While the case studies presented here focus on marine  
368 microbial communities, the functionality of the MiA and ViA programs is broadly applicable to  
369 any field of microbial ecology for analyzing microscopy images from cultured or environmental  
370 samples.

371

### 372 *Limitations and Potential Developments*

373 While the focus for the development of the first iterations of MiA and ViA was manual  
374 image analysis from complex environmental samples, some image analyses would benefit from a  
375 more routine and faster procedure. Therefore, future iterations of the program could run an  
376 analysis on batches of similar images after the user sets certain parameters (e.g., thresholding  
377 channel, thresholding level, etc.).

378 Program memory influences the size of the program and the speed at the which the  
379 program can be used. MiA and ViA currently have temporary memory during an imaging  
380 session. For example, loading new images during the same session retains some preferences,  
381 such as the directory of the last image selected and the order of set color channels for grayscale  
382 and CZI images. However, the programs do not currently maintain any settings between program  
383 instances. In future iterations of the program, the temporary memory could be used as a  
384 foundation to develop greater program memory and enable the user to save desired settings  
385 between sessions.

386 The data collected by the program is currently provided in an easy-to-use format, which  
387 enables the user flexibility with the types of downstream analyses they can perform in their  
388 program of choice (e.g., excel, R, python). However, the programs cannot currently be used to  
389 perform any statistics on the image data. Based on user needs, future iterations of the program  
390 could leverage MATLAB's Statistics and Machine Learning Toolbox.

391

### 392 **Data Availability Statements**

393

394 The programs, datasets, and code can be found in the following public GitHub repositories:  
395 <https://github.com/PECO-CP/MiA> and <https://github.com/PECO-CP/ViA>.

396

### 397 **Author Contributions**

398 ALP conceptualized both programs, wrote the initial code used in ViA, was involved in program  
399 testing and improvements, and wrote the manuscript. MDW wrote the code for an early iteration  
400 of MiA and contributed to program improvements. JFH was the primary contributor to the code  
401 for MiA and ViA, played an active role program development and testing, and was involved in  
402 manuscript and manual writing. DEM contributed to the testing of MiA and ViA, contributed to  
403 manuscript and manual writing, and was involved in case study development. All authors revised  
404 and approved the manuscript.

405

### 406 **Methods**

407

408 *Software* – The open-source software described above is available online at  
409 <https://github.com/PECO-CP/MiA> and <https://github.com/PECO-CP/ViA>. Materials for all three  
410 case studies as well as detailed manuals are also available on this public repository.

411  
412 *Sample preparation and fixation* – For the natural plankton image, a surface water samples (75  
413 mL) was collected at the Cal Poly Pier in Avila Beach, CA (35.1698° N, 120.7408° W) and  
414 preserved with alkaline Lugol’s solution (0.05% final concentration) followed by  
415 paraformaldehyde (PFA; 2% final concentration) and sodium thiosulfate (0.003% final  
416 concentration) using a modified protocol from Sherr and Sherr (1993). The preserved sample  
417 was fixed at 4°C for 24 hours prior to filtration. The sample was stained with proflavine (0.33%  
418 final concentration) and DAPI (0.05 µg/mL final concentration) prior to filtration. Samples were  
419 then filtered onto 8.0µm black polycarbonate filters, mounted onto glass slides with VectaShield  
420 mounting medium (Vector Labs) and kept frozen at -80°C until imaging. For the culture image,  
421 *Dunialla tertiolecta* was added to a culture of *Oxyrrhis marina* as prey and minutes later the  
422 mixed culture was fixed with glutaraldehyde (0.5% final concentration) at 4°C for 24 hours. 10  
423 ml of sample was filtered onto a 0.8 µm black polycarbonate filter, mounted onto glass slides  
424 with DAPI VectaShield mounting medium (Vector Labs) and kept frozen at -80°C until imaging.  
425 The virus image was prepped as in Pasulka et al. (2018). EhV207 (MOI of 5) was added to a  
426 culture of *E. huxleyi* (CCMP strain 374) in exponential phase. Upon host lysis, the sample was  
427 filtered through a 0.45 µm filter, fixed with glutaraldehyde (0.5% final concentration) for 15 min  
428 at 4°C, flash frozen in liquid nitrogen, and stored at -80°C. The sample was then spotted directly  
429 onto a Teflon printed glass slide (Electron Microscopy Sciences, PTFE Printed Slides) and air-  
430 dried. The sample was counterstained for 15 min with SYBR Gold (0.25% final concentration),  
431 washed with 0.02-µm filtered water, and air-dried prior to image analysis.

432  
433 *Microscopy* – Samples were analyzed with a Zeiss Axio Observer Z1 inverted epifluorescence  
434 microscope using a 20X (natural phytoplankton community and culture image) or 100X  
435 objective (virus image) using Zen Microscope Software. Digital images were acquired with a 6-  
436 megapixel CCD camera (Zeiss Axiocam 506 mono). The peak channel excitation and emissions  
437 wavelength/bandpass in nm were 365 and 445/50 for blue (DAPI-stained cells), 470/70 and  
438 525/50 for green (fluorescence signal of proflavine and SYBR gold as well as autofluorescence  
439 signal of glutaraldehyde), and 440/40 and 675/50 for red (chlorophyll autofluorescence). For the  
440 natural phytoplankton community sample, 10 z-plane images were acquired for each  
441 fluorescence channel. The resulting z-stack images were subsequently combined using an  
442 extended depth of focus (EDF) algorithm within the Zen software (ZEN Blue 2.3) to create an  
443 in-focus image.

#### 444 445 **Acknowledgements**

446 We acknowledge Cal Poly’s Research, Scholarly, and Creative Activities Grant Program for  
447 supporting the development of the image programs and DEM as well as the Bill and Linda Frost  
448 Fund for supporting summer research experiences for both MDW and JFH. We would also like  
449 to thank all of the students who used and tested the program, including several supported by the  
450 Santa Rosa Creek Foundation. We would also like to acknowledge Polerecky et al. (2012) who’s  
451 open-source nanoSIMS data processing tool provided inspiration for this Matlab-based imaging  
452 program.

453

454 **References:**

- 455 Allers, E., Moraru, C., Duhaime, M. B., Beneze, E., Solonenko, N., Barrero-Canosa, J., Amann,  
456 R., Sullivan, M. B. (2013). Single-cell and population level viral infection dynamics revealed by  
457 phageFISH, a method to visualize intracellular and free viruses. *Environ. Microbiol.*, 15: 2306–  
458 2318.
- 459
- 460 Barrero-Canosa, J. and Moraru, C. (2018). PhageFISH for monitoring phage infections at single  
461 cell level. In Martha R. J. Clokie et al. (eds.), *Bacteriophages: Methods and Protocols*, Volume  
462 IV, *Methods in Molecular Biology*, vol. 1898.
- 463
- 464 Benfield, M., Grosjean, P., Culverhouse, P., et al. (2007). RAPID: research on automated  
465 plankton identification. *Oceanography*, 20: 172-187.
- 466
- 467 Carpenter, A.E., Jones, T.R., Lamprecht, M.R., Clarke, C., Kang, I.H., Friman, O., Guertin,  
468 D.A., Chang, J.H., Lindquist, R.A., Moffat, J., Golland, P., Sabatini, D.M. (2006). CellProfiler:  
469 image analysis software for identifying and quantifying cell phenotypes. *Genome Biology*, 7:  
470 17076895
- 471
- 472 Caron, D. A. (1983). Technique for the enumeration of heterotrophic and phototrophic  
473 nanoplankton, using epi-fluorescence microscopy, and comparison with other procedures.  
474 *Appl. Environ. Microbiol.*, 46: 491-498.
- 475
- 476 Castelletto, S. and Boretti, A. (2021). Viral particle imaging by super-resolution fluorescence  
477 microscopy. *Chemical Physics Impact.*, 2: 100013.
- 478
- 479 Chen, F., Lu, J-R, Binder, B.J., Liu, Y-C., Hodson, R.E. (2001). Application of digital image  
480 analysis and flow cytometry to enumerate marine viruses stained with SYBR Gold. *Appl.*  
481 *Environ. Microbiol.*, 67: 539-545.
- 482
- 483 Christaki, U., Courties, C., Massana, R., Catala, P., Lebaron, P., Gasol, J.M., Zubkov, M.V.  
484 (2011). Optimized routine flow cytometric enumeration of heterotrophic flagellates using SYBR  
485 Green I. *Limnol. Oceanogr. Methods*, 9: 329-339.
- 486
- 487 Colin, S., Coelho, L. P., Sunagawa, S., Bowler, C., Karsenti, E., Bork, P., Pepperkok, R., de  
488 Vargas, C. (2017) Quantitative 3D-imaging for cell biology and ecology of environmental  
489 microbial eukaryotes. *eLife*, 6: e26066.
- 490
- 491 Daims, H., Lückner, S., Wagner, M. (2006). Daime, a novel image analysis program for microbial  
492 ecology and biofilm research. *Environ. Microbiol.*, 8: 200–213.
- 493
- 494 Haas, LW (1982). Improved epifluorescent microscopic technique for observing planktonic  
495 micro-organisms. *Ann. Inst. Oceanogr.*, 58: 261-266.
- 496
- 497 Hamasaki, K., Long, R. A., and Azam, F. (2004). Individual cell growth rates of marine bacteria,  
measured by bromodeoxyuridine incorporation. *Aquat. Microb. Ecol.*, 35: 217.

- 498 Hatzenpichler, R., Scheller, S., Tavormina, P. L., Babin, B. M., Tirrell, D. A., and Orphan, V. J.  
499 (2014). *In situ* visualization of newly synthesized proteins in environmental microbes using  
500 amino acid tagging and click chemistry. *Environ. Microbiol.*, 16: 2568–2590.
- 501 Hense, B.A., Gais, P., Jutting, U., Scherb, H., Rodenacker, K. (2008) Use of fluorescence  
502 information for automated phytoplankton investigation by image analysis. *J. Plank. Res.*, 30:  
503 587–606.
- 504 Hobbie, J. E., Daley, R. J., and Jasper, S. (1977). Use of nuclepore filters for counting bacteria  
505 by fluorescence microscopy. *Appl. Environ. Microbiol.*, 33, 1225–1228.
- 506 Jaqaman, K., Loerke, D., Mettlen, M. et al. (2008). Robust single-particle tracking in live-cell  
507 time-lapse sequences. *Nat. Methods*, 5: 695-702.  
508
- 509 Khachikyan, A., Milucka, J., Littmann, S., Ahmerkamp, S., Meador, T., Könneke, M., Burg, T.,  
510 and Kuypers, M. (2019). Direct Cell Mass Measurements Expand the Role of Small  
511 Microorganisms in Nature. *Appl. Environ. Microbiol.*, 85: e00493-19.  
512
- 513 Lee, D.W., Hsu, H-L, Bacon, K.E., Daniel, S. (2016). Image restoration and analysis of influenza  
514 virions binding to membrane receptors reveal adhesion-strengthening kinetics. *PLoS One*, 11:  
515 e0163437.  
516
- 517 Lombard, F., Boss, E., Waite, A.M., et al. (2019). Globally consistent quantitative observations  
518 of planktonic ecosystems. *Front Mar Sci* 6: 196.  
519
- 520 McQuin C, Goodman A, Chernyshev V, Kamensky L, Cimini BA, Karhohs KW, Doan M, Ding  
521 L, Rafelski SM, Thirstrup D, Wiegraebe W, Singh S, Becker T, Caicedo JC, and Carpenter AE  
522 (2018). CellProfiler 3.0: Next-generation image processing for biology. *PLoS Biol.*, 16:  
523 e2005970  
524
- 525 Michels, D.E., Lomenick, B., Chou, T-F., Sweredoski, M.J., Pasulka, A.L. (2021). Amino acid  
526 analog induces stress response in marine *Synechococcus*. *Appl. Environ. Microbiol.*, 87, e00200-  
527 21.  
528
- 529 Miloslavich, P., Bax, N.J., Simmons, S.E. et al. (2018). Essential ocean variables for global  
530 sustained observations biodiversity and ecosystem changes. *Glob. Change Biol.*, 24: 2416-2433.  
531
- 532 Noble, R.T. and Fuhrman, J.A. (1998). Use of SYBR Green I for rapid epifluorescence counts of  
533 marine viruses and bacteria. *Aquat. Microb. Ecol.*, 14: 113-118.  
534
- 535 Olson, R.J. and Sosik, H.M. (2007). A submersible imaging-in-flow instrument to analyze nano-  
536 and microplankton: Imaging FlowCytobot. *Limnol. Oceanogr. Methods*, 5: 195-203.  
537
- 538 Otsu, N. (1979) A threshold selection method from gray-level histograms. *IEEE Transactions on*  
539 *Systems, Man, and Cybernetics*. 9: 62-66.  
540

- 541 Pasulka, A.L., Landry, M.R., Taniguchi, D.A.A., Taylor, A.G., Church, M.J. (2013). Temporal  
542 dynamics of phytoplankton and heterotrophic protists at station ALOHA. *Deep Sea Res. II*, 93:  
543 44-57.  
544
- 545 Pasulka, A.L., Thamatrakoln, K., Kopf, S.H., Guan, Y., Poulos, B., Moradian, A., Sweredoski,  
546 M.J., Hess, S., Sullivan, M.B., Bidle, K.D., Orphan, V.J. (2018). Interrogating marine virus-host  
547 interactions and elemental transfer with BONCAT and nanoSIMS-based methods. *Environ.*  
548 *Microbiol.*, 20: 671-692.  
549
- 550 Patel, A., Noble, R.T., Steele, J.A., et al. (2007). Virus and prokaryote enumeration from  
551 planktonic aquatic environments by epifluorescence microscopy with SYBR Green I. *Nature*  
552 *Protocols*, 2: 269-276.  
553
- 554 Pernthaler, A., and Amann, R. (2004). Simultaneous fluorescence in situ hybridization of mRNA  
555 and rRNA in environmental bacteria. *Appl. Environ. Microbiol.*, 70: 5426-5433.  
556
- 557 Polerecky, L., Adam, B., Milucka, J., et al. (2012). Look@NanoSIMS – a tool for the analysis of  
558 nanoSIMS data in environmental microbiology. *Environ. Microbiol.* 14: 1009-1023.  
559
- 560 Samo, T.J., Smriga, S., Malfatti, F., Sherwood, B.P., Azam, F. (2014). Broad distribution and  
561 high proportion of protein synthesis active marine bacteria revealed by click chemistry at the  
562 single cell level. *Front Mar. Sci.*, 1: 48.  
563
- 564 Sebastian, M., Gasol, J.M. (2019). Visualization is crucial for understanding microbial processes  
565 in the ocean. *Phil. Trans. R. Soc. B.*, 374: 20190083.  
566
- 567 Schulze, K., Tillich, U.M., Dandekar, T., Frohme, M. (2013) PlanktoVision—an automated  
568 analysis system for the identification of phytoplankton. *BMC Bioinformatics*, 14:1.  
569
- 570 Sherr, B., and Sherr, E. (1983). Enumeration of heterotrophic microprotozoa by epifluorescence  
571 microscopy. *Estuarine, Coastal, and Shelf Science*, 16: 1-7.  
572
- 573 Sherr, B.F., Sherr, E.B., Fallon, R.D. (1987). Use of monodispersed, fluorescently labeled  
574 bacteria to estimate in situ protozoan bacterivory. *Appl Environ Microbiol.*, 53:958-965.  
575
- 576 Shopov A., Williams, S.C., Verity, P.G. (2000). Improvements in image analysis and  
577 fluorescence microscopy to discriminate and enumerate bacteria and viruses in aquatic samples.  
578 *Aquatic Microbial Ecology*, 22: 103-110.  
579
- 580 Sosik, H.M. and Olson, R.J. (2007). Automated taxonomic classification of phytoplankton  
581 sampled with imaging-in-flow cytometry. *Limnol. Oceanogr. Methods*, 5: 204-216.  
582
- 583 Taylor, A.G., Goericke, R., Landry M.R., Selph, K.E., Wick, D.A., Roadman, M.J. (2012). Sharp  
584 gradients in phytoplankton community structure across a frontal zone in the California Current  
585 Ecosystem. *J Plankton Res.*, 34: 778-789.  
586

- 587 Taylor, A.G., Landry, M.R., Selph, K.E., Wokuluk, J.J. (2015). Temporal and spatial patterns of  
588 microbial community biomass and composition in the Southern California Current Ecosystem.  
589 Deep Sea Res. II, 112: 117-128.  
590
- 591 Turzynski, V., Monsees, I., Moraru, C., Probst, A.J. (2021). Imaging techniques for detecting  
592 prokaryotic viruses in environmental samples. Viruses, 13: 2126.  
593
- 594 Wait, E.C., Reiche, M.A., Chew, T-L. (2020). Hypothesis-driving quantitative fluorescence  
595 microscopy – the importance of reverse-thinking in experimental design. J. Cell Sci., 133:  
596 jcp250027.  
597
- 598 Wang, I-H., Burckhardt, C.J., Yakimovich, A., Greber, U.F. (2018). Imaging, tracking and  
599 computational analysis of virus entry and egress with the cytoskeleton. Viruses, 10, 166.  
600 Waters J. C. (2009). Accuracy and precision in quantitative fluorescence microscopy. The  
601 Journal of Cell Biology, 185: 1135–1148.  
602
- 603 Waters, J. C., and Wittmann, T. (2014). Concepts in quantitative fluorescence microscopy.  
604 Methods in Cell Biology, 123: 1–18.  
605
- 606 Weinbauer, M.G., and Suttle, C.A. (1997). Comparison of epifluorescence and transmission  
607 electron microscopy for counting viruses in natural marine waters. Aquatic Microbial Ecology,  
608 13, 225-232.  
609
- 610 Wollman, R., and Stuurman, N. (2007). High throughput microscopy: from raw images to  
611 discoveries. Journal of cell science, 120: 3715–3722.

**Table 1.** Description and use case for available ROI Tools for MiA

|                                        | ROI Tool                          | Description                                                                                                                                                                                                                     | Use Case                                                                                                                                                                                                                                                                            |
|----------------------------------------|-----------------------------------|---------------------------------------------------------------------------------------------------------------------------------------------------------------------------------------------------------------------------------|-------------------------------------------------------------------------------------------------------------------------------------------------------------------------------------------------------------------------------------------------------------------------------------|
| Designate multiple ROIs simultaneously | Manual Threshold All ROIs         | The manual threshold tool appears and lets you define a threshold for the entire image. All ROIs detected in the entire image are kept.                                                                                         | This feature enables you to select all ROIs in the image simultaneously and works best with images that have dark backgrounds and clearly distinguishable cells.                                                                                                                    |
|                                        | Auto Threshold a Region of ROIs   | Lets you draw a freehand region on the image. By double-clicking and finalizing the freehand, the program auto-thresholds the region and defines all ROIs it discovers.                                                         | This feature enables you to select all ROIs within a region on the image and works best with mages that have variation in background intensity or cell brightness, and/or lots of particle debris such that thresholding the entire image is not effective.                         |
|                                        | Manual Threshold a Region of ROIs | Lets you draw a freehand region on the image. By double-clicking and finalizing the freehand, the manual threshold tool appears and lets you define the threshold for the region. All ROIs detected within the region are kept. | This feature is distinct from "Auto threshold a region of ROIs" in that it allows you to adjust the thresholding boundary to obtain accurate cell edges. This can be helpful for images with lots of particle debris that have distinct levels of brightness relative to the cells. |
| Designate a single ROI                 | Automatic Threshold ROI           | Lets you draw a freehand region on the image. By double-clicking and finalizing the freehand, the program auto-thresholds the region and defines the largest ROI it discovers.                                                  | When there is a particular cell you want to ID within a region (and it has visible fluorescence), but do not want create a freehand boundary.                                                                                                                                       |
|                                        | Manual Threshold ROI              | Lets you draw a freehand region on the image. By double-clicking and finalizing the freehand, the manual threshold tool appears and lets you define the threshold for that region. Only the largest ROI is defined.             | When there is a particular cell you want to ID within a region (and it has visible fluorescence). This feature is distinct from the automatic threshold in that it enables you to adjust the thresholding boundary to obtain accurate cell edges.                                   |
|                                        | Draw Ellipse ROI                  | Lets you define an ellipsoid region on the image. It can be dragged, rotated, prolated and oblated until it best matches the ROI you'd like to define. Once defined, double-click to finalize.                                  | This feature is useful for selecting a single cell that has a circular or ellipsoid shape.                                                                                                                                                                                          |
|                                        | Draw Freehand ROI                 | Lets you define a freehand region on the image. It can be defined in any direction using waypoints until it best matches the ROI you'd like to define. Once defined, double-click to finalize.                                  | This feature is useful for selecting a single cell that you manually draw around to create.                                                                                                                                                                                         |
| Edit ROIs                              | Split ROI                         | Lets you split one or multiple ROIs into separate ROIs. Draw a single line freehand between two or more ROIs. The line can be of any path shape; all ROIs intersecting the line will be split along it.                         | This feature is useful to separate two ROIs touching.                                                                                                                                                                                                                               |
|                                        | Delete ROI                        | Lets you select a single ROI to remove.                                                                                                                                                                                         | This feature lets you remove unwanted ROIs.                                                                                                                                                                                                                                         |

**Table 2.** Description of steps required for processing images within ViA

| Viral Image Analysis Step  | Functionality                                                                                                                                                                                                                                                                                                                                                                                                                                                                                                                                                                                                 |
|----------------------------|---------------------------------------------------------------------------------------------------------------------------------------------------------------------------------------------------------------------------------------------------------------------------------------------------------------------------------------------------------------------------------------------------------------------------------------------------------------------------------------------------------------------------------------------------------------------------------------------------------------|
| Initial Interface          | Panel that appears after the image is loaded. The leftmost panel displays the raw image(s) and the rightmost panel provides information about the image(s), including image type, location, size, and bit depth.                                                                                                                                                                                                                                                                                                                                                                                              |
| Background subtraction     | This step performs a background subtraction via a rolling-ball method. The rolling-ball takes discs of equal size and segments the image accordingly, subtracting the average intensity of each disc from the disc's area. The default disc size is 10 pixels which can be adjusted as desired.                                                                                                                                                                                                                                                                                                               |
| Thresholding viruses       | This step performs thresholding via Matlab's "graythresh" ( <a href="https://www.mathworks.com/help/images/ref/graythresh.html">https://www.mathworks.com/help/images/ref/graythresh.html</a> ) algorithm. Thresholding attempts to identify regions of interests (ROIs) in each image and redisplay both images in binary form. The program will attempt to provide an initial threshold level. However, the threshold level can be manually adjusted to more accurately capture the particles of interest. The goal of this step is to separate viral particles of interest from undesired image artifacts. |
| Aligning Images            | Optional step. Only enabled if two image channels are loaded. In order to determine if a particle is labeled, the images need to be aligned. Therefore, this step attempts to align the LABELED image to DNA image so that the same ROIs between the two images are in the same relative position.                                                                                                                                                                                                                                                                                                            |
| Removal of pixel artifacts | This step allows the user another chance to remove any remaining pixel artifacts, such as large clumps of debris/cells or misidentified small ROIs, by setting a minimum and maximum ROI size for each image. This step also display ROI statistics of each image. Finally, this is also the step where a micrometer conversion can be added to see statistics and the following histograms in micrometer units as opposed to default pixel units.                                                                                                                                                            |
| Data Display               | The final display plots three histograms of gathered ROI data based on whether one or two images were loaded. The first histogram is major axis length of the ROIs. If two images are loaded, this histogram reflects the ROIs in the DNA image. The second histogram displays the background-subtracted fluorescence signal or if two images are loaded, it displays the background-subtracted LABELED to DNA fluorescent signal ratios. The third histogram displays identical information as the second, except not background subtracted in order to visualize the impact of background subtraction.      |



**Figure 1.** Overview of Program Structure

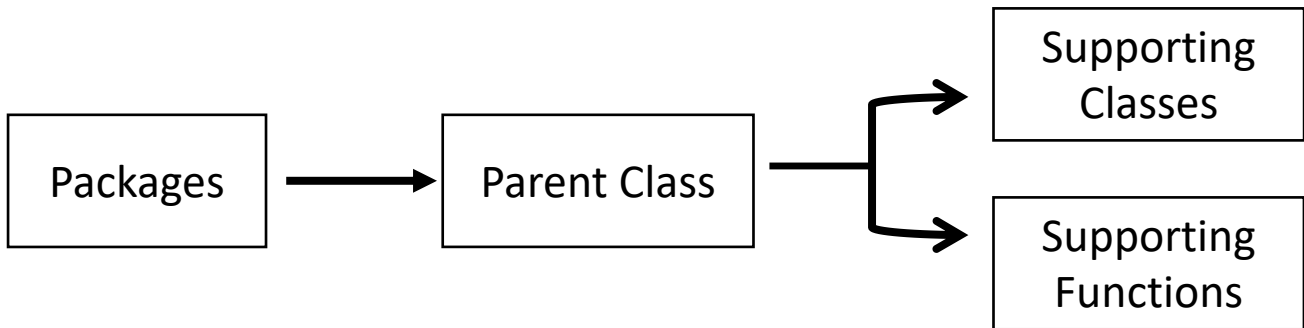

**Figure 2.** Overview of the MiA interface. The pop-outs on the left represent file options (green), ROI selection tools (blue), and display options (red). On the right, the image options are shown including display properties (inset), channel properties (yellow pop-out) and image properties (purple pop-out). The panel on the left also has a pixel size-selection feature (black square) that enables users to set a lower and upper pixel limit for ROIs. In the middle of the panel the image is visualized with a single cell outlined (e.g., region of interest; ROI). The file input directory and output directory are displayed just below the image and the statistics of the ROI (in pixels) are displayed just to the left of the image. If a conversion factor is added, the statistics will also be displayed in micrometers ( $\mu\text{m}$ ).

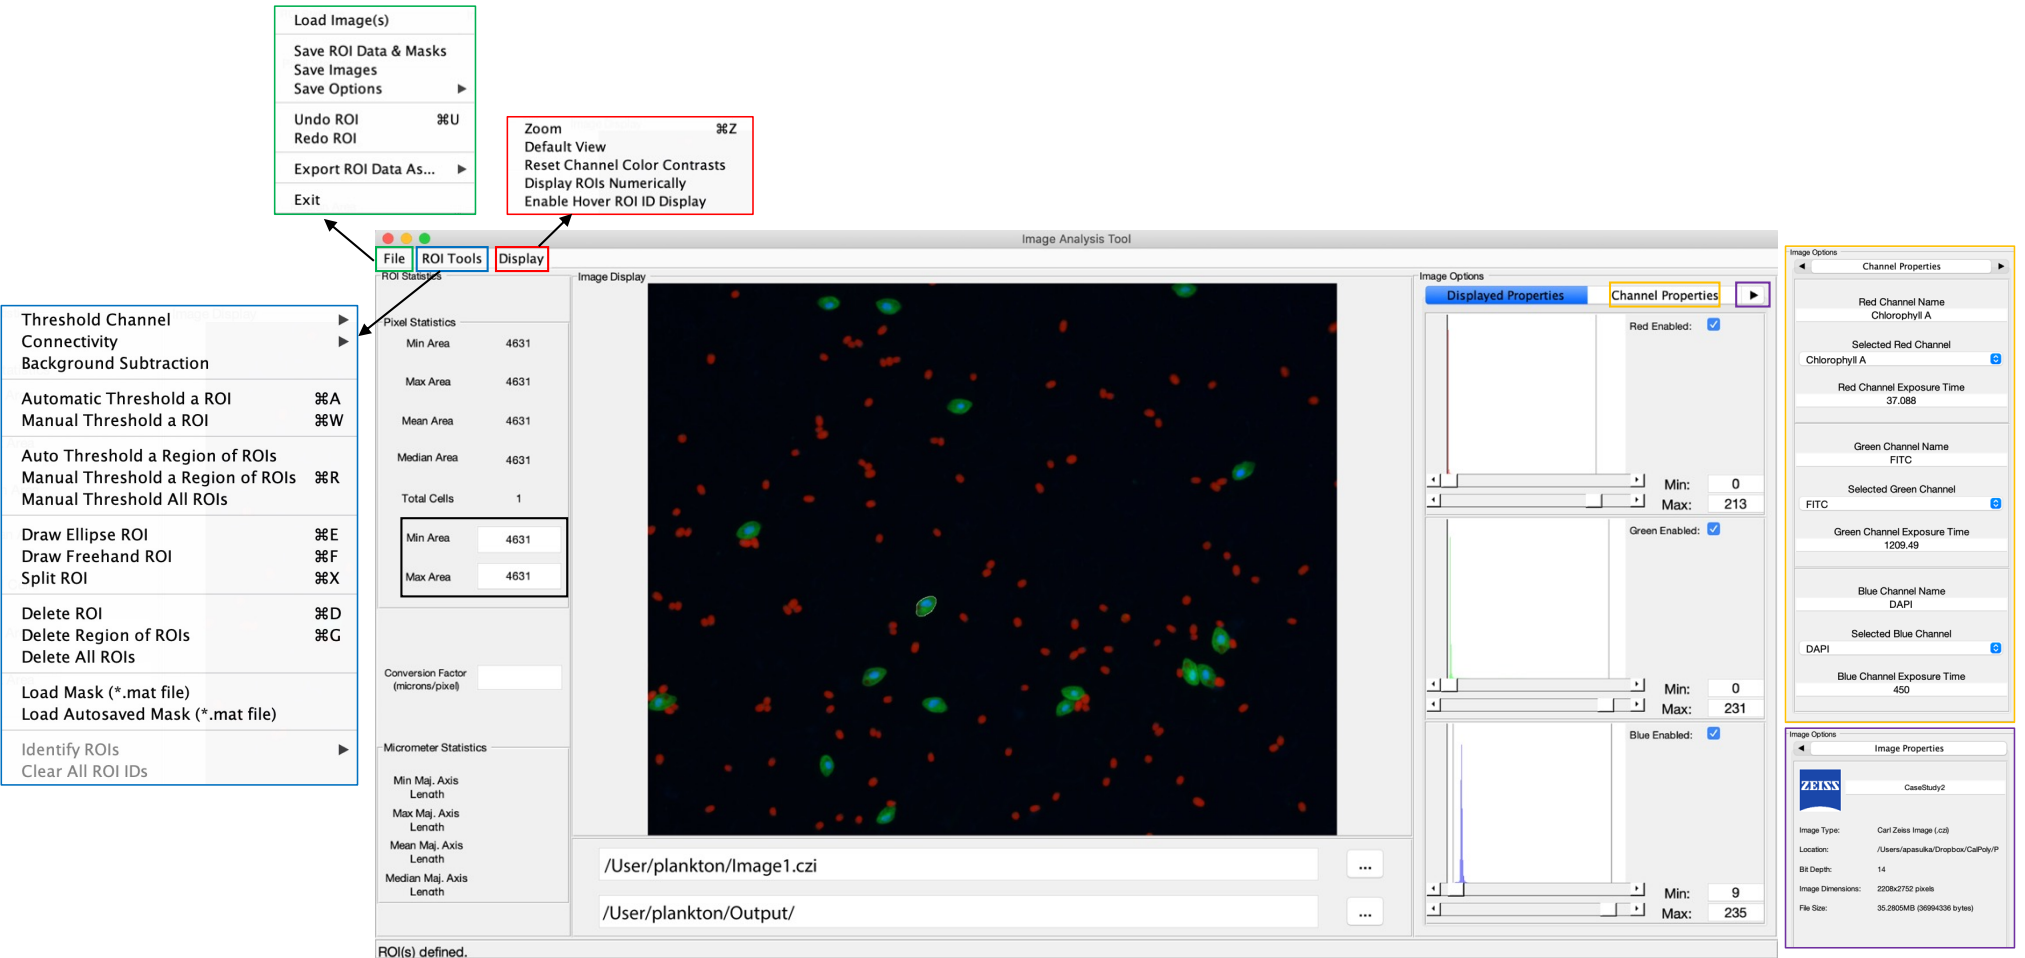

**Figure 3.** Overview of the VIA interface. The left-hand side displays a single image if only one channel is loaded (A) or a double image if two channels are loaded (B). The right-hand side contains a series of panels that are used in a sequential order and details of the processing on each panel can be found in table 2. Shown here is the panel in which the user can decide the min and max pixel range of interest (black square), which then displays the statistics of the viral particles after the processing steps. The file input directory and output directory are displayed just below the image and the insets in panel A show the drop-down menus including the file menu (green), the display menu (red) and the help menu (blue).

**Panel A: Single Channel (DNA)**

File menu (green): Load Image(s), Save Data, Save Centroid Snapshot, Save Snapshot, Export Data As..., Exit

Display menu (red): Display Centroids, Zoom

Help menu (blue): Manual, Licensing

| Pixel Statistics |  | DNA    | LABELLED |
|------------------|--|--------|----------|
| Min pixel        |  | 13     |          |
| Max pixel        |  | 75     |          |
| Mean pixel       |  | 58.911 |          |
| Median pixel     |  | 60     |          |
| Total ROIs       |  | 427    |          |

| Align Images                 |  | DNA    | LABELLED |
|------------------------------|--|--------|----------|
| Min pixel                    |  | 10     | 0        |
| Max pixel                    |  | 75     | Inf      |
| Conversion Factor (um/pixel) |  | 0.0416 |          |

| Micrometer (um) Statistics |  | DNA      | LABELLED |
|----------------------------|--|----------|----------|
| Min um                     |  | 0.022497 |          |
| Max um                     |  | 0.12979  |          |
| Mean um                    |  | 0.10195  |          |
| Median um                  |  | 0.10383  |          |

Input: /User/virus/Image1.czi  
Output: /User/virus/Output/

**Panel B: Double Channel (DNA and Labeled)**

| Pixel Statistics |  | DNA    | LABELLED |
|------------------|--|--------|----------|
| Min pixel        |  | 11     | 10       |
| Max pixel        |  | 100    | 97       |
| Mean pixel       |  | 54.613 | 33.2622  |
| Median pixel     |  | 52     | 27       |
| Total ROIs       |  | 491    | 164      |

| Align Images                 |  | DNA    | LABELLED |
|------------------------------|--|--------|----------|
| Min pixel                    |  | 10     | 10       |
| Max pixel                    |  | 100    | 100      |
| Conversion Factor (um/pixel) |  | 0.0416 |          |

| Micrometer (um) Statistics |  | DNA      | LABELLED |
|----------------------------|--|----------|----------|
| Min um                     |  | 0.019036 | 0.017306 |
| Max um                     |  | 0.17306  | 0.16786  |
| Mean um                    |  | 0.094511 | 0.057562 |
| Median um                  |  | 0.089989 | 0.046725 |

Input: /User/virus/Image1.czi  
Output: /User/virus/Output/

Figure 4

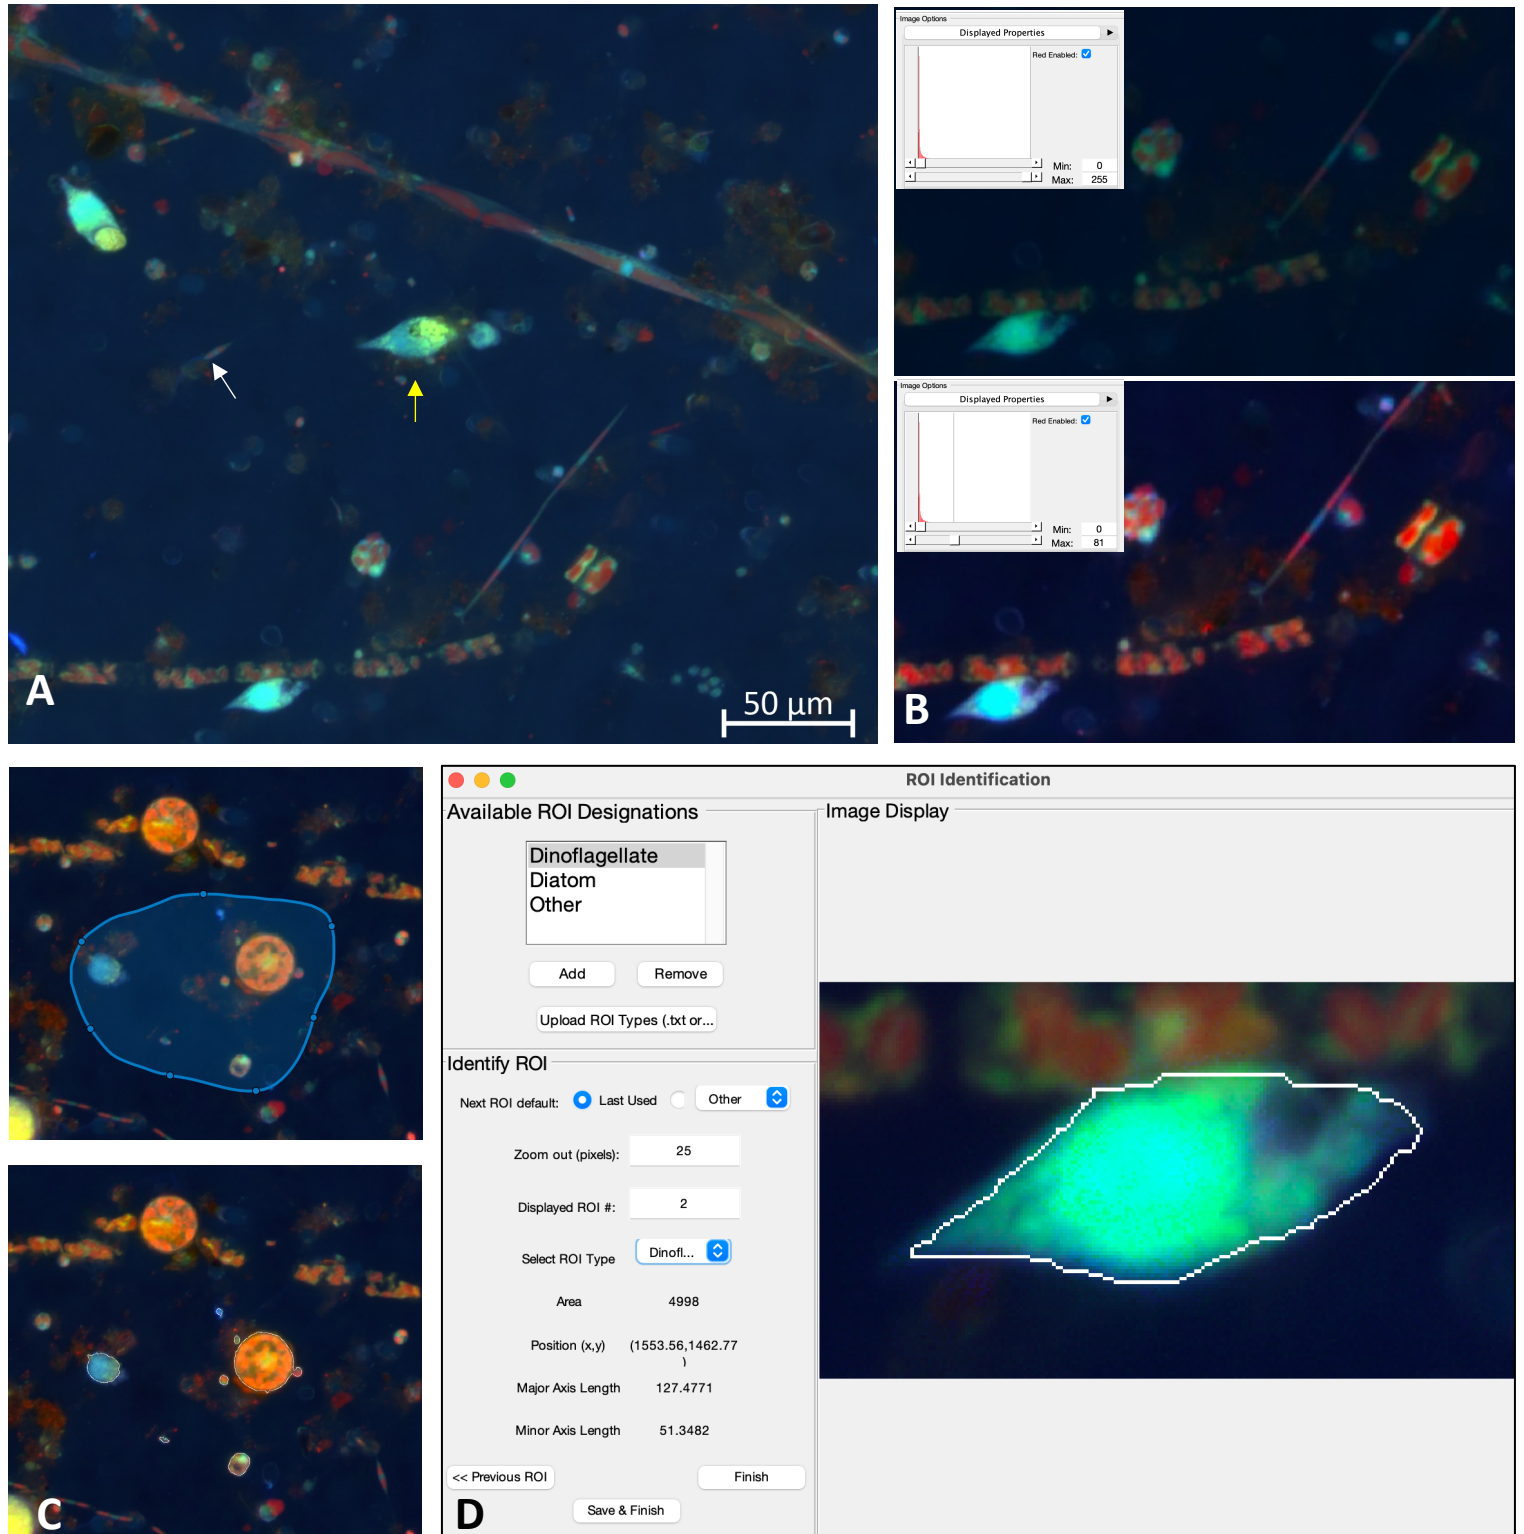

**Figure 4.** A) Example image of natural plankton community with fainter diatom cells (white arrow) and brighter dinoflagellate cells (yellow arrow). B) An example of contrast adjustments available for real-time cell selection showing how altering the red signal (inset) enhances the ability to see cells for ROI selection (bottom image displays enhanced signal). C) Example of regional thresholding – both the selected region (top) and outlined cells within the region (bottom). D) ROI Identification window with a dinoflagellate outlined.

Figure 5

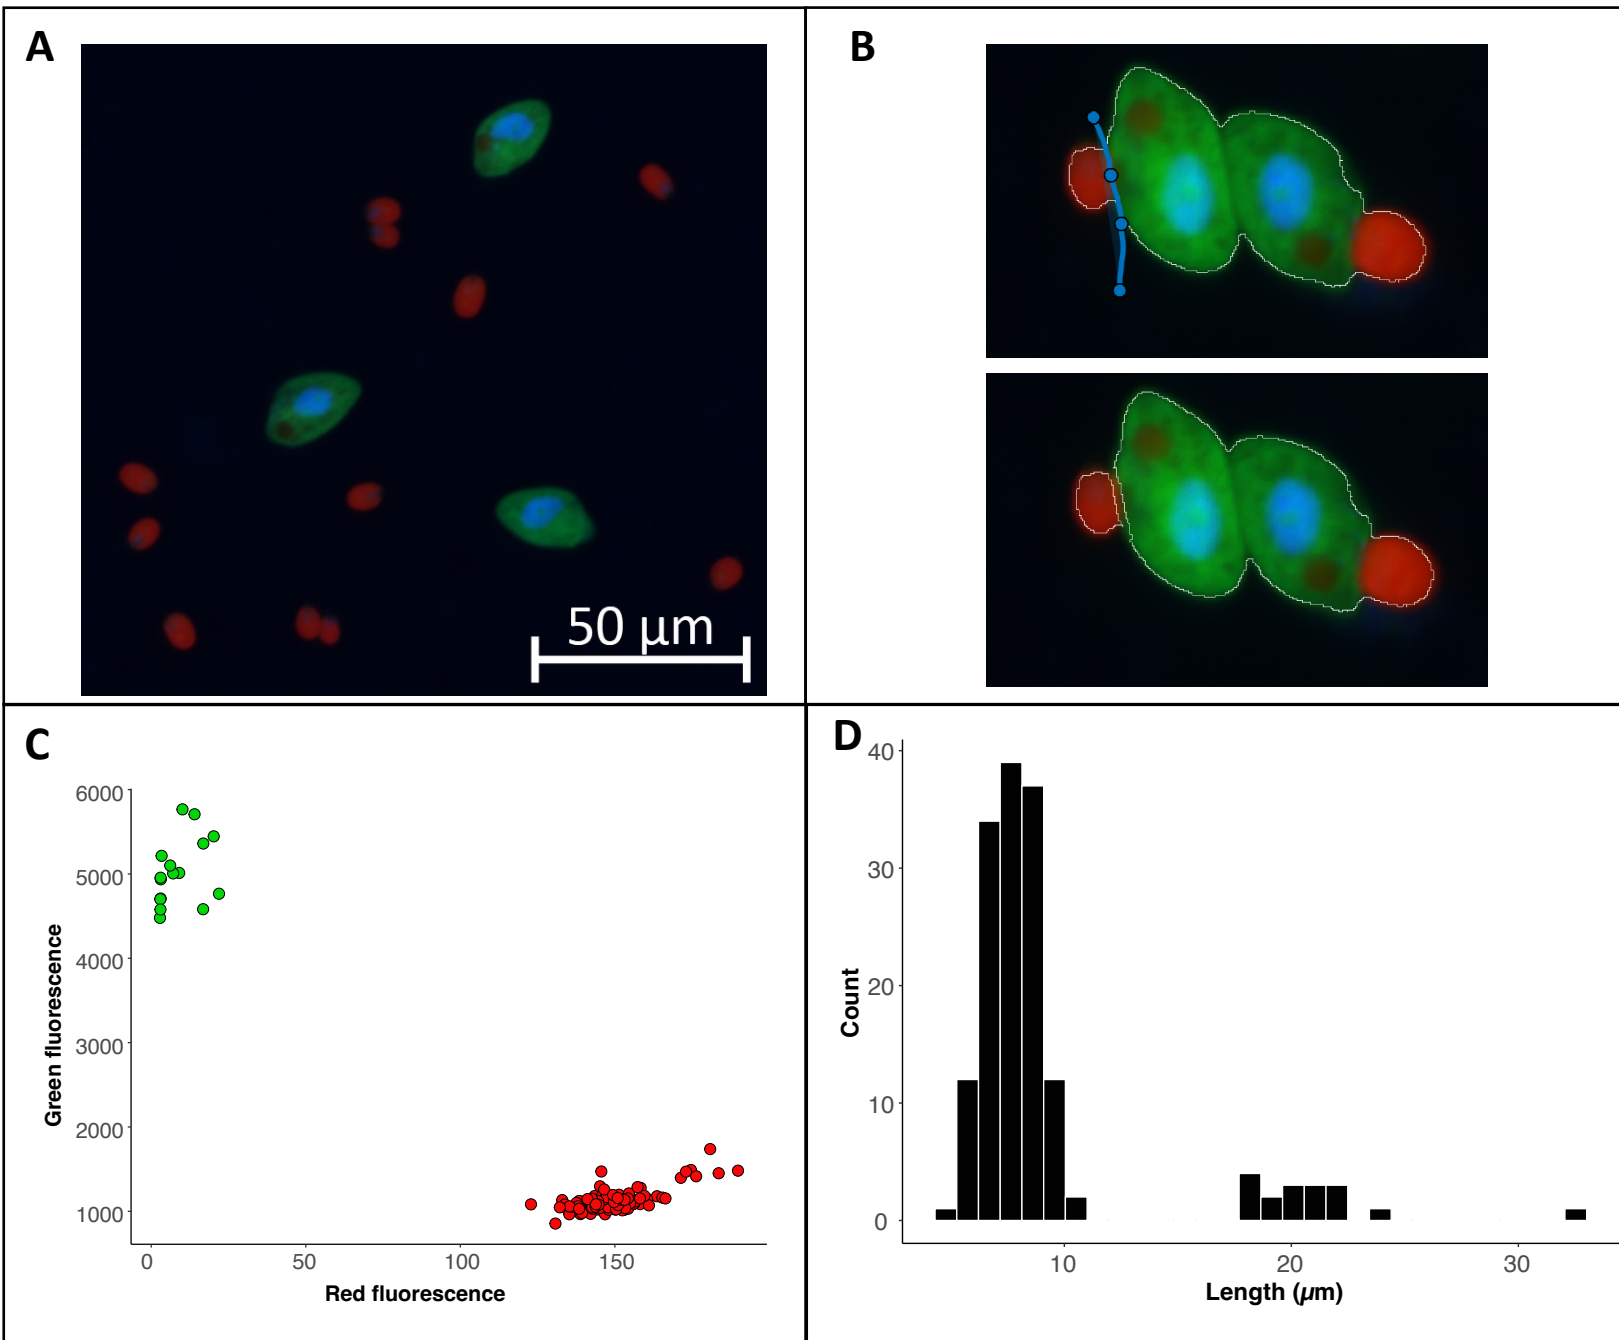

**Figure 5.** Example image of from a culture of *O. marina* (green cells) fed *D. tertiolecta* (red cells) (A). The split cell feature can be used to separate cells that were outlined as a single cell (B). The data exported from the program can be used to visualize the fluorescence or size data collected within each region of interest. For this case study we have used R to visualize the separation of cells by fluorescent signal with the *D. tertiolecta* (red circles) having a higher red fluorescence signal and the *O. marina* (green circles) having a higher green fluorescent signal (C). In addition, we have visualized the size distribution of cells from the image with the smaller cells representing the prey *D. tertiolecta* and the larger cells representing the dinoflagellate grazer *O. marina* (D).

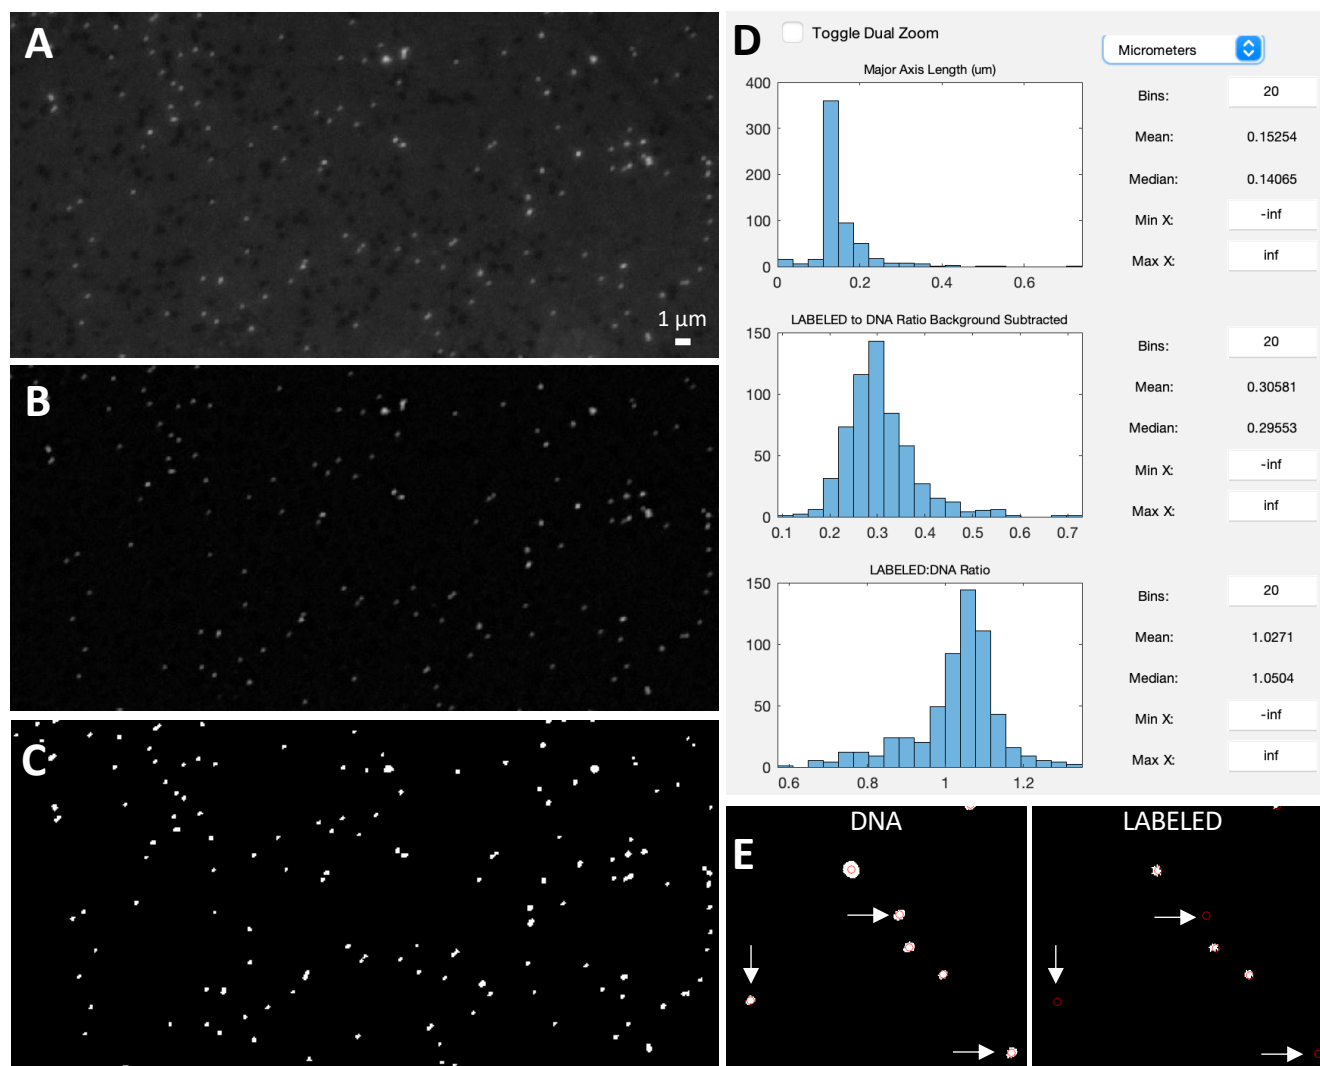

**Figure 6.** Example image of viruses before background subtraction (A), after background subtraction (B), and after thresholding (C). Data display panel (D) showing the size and fluorescent ratios of viral particles. Zoomed in regions of a 'DNA' and 'Labeled' images (E) showing centroids around viral particles (as defined by the DNA image). White arrows indicate viral particles that do not have a Labeled signal.
